# Supplementary material for: Molecular models for WH6 under pressure
Source: Royal Society of Chemistry journal article supplement (doi:10.1039/c1nj20560a), 2011-01-01
Supplement: c1nj20560a.pdf [file c1nj20560a.pdf]

# MOLECULAR MODELS FOR $WH_6$ UNDER PRESSURE

## SUPPORTING INFORMATION

**Figure S1.** Histograms of W-H (pink) and W-W (grey) distances in  $WH_n$   $n=1-6,8$  at  $P=50$  GPa.

**Figure S2.** Histograms of H-H (pink) and H-W (grey) distances in  $WH_n$   $n=1-6,8$  at  $P=50$  GPa.

**Figure S3.** Experimental structures of  $CaB_6$ ,  $CaC_6$ ,  $MoF_6$ ,  $WF_6$  and  $WCl_6$ .

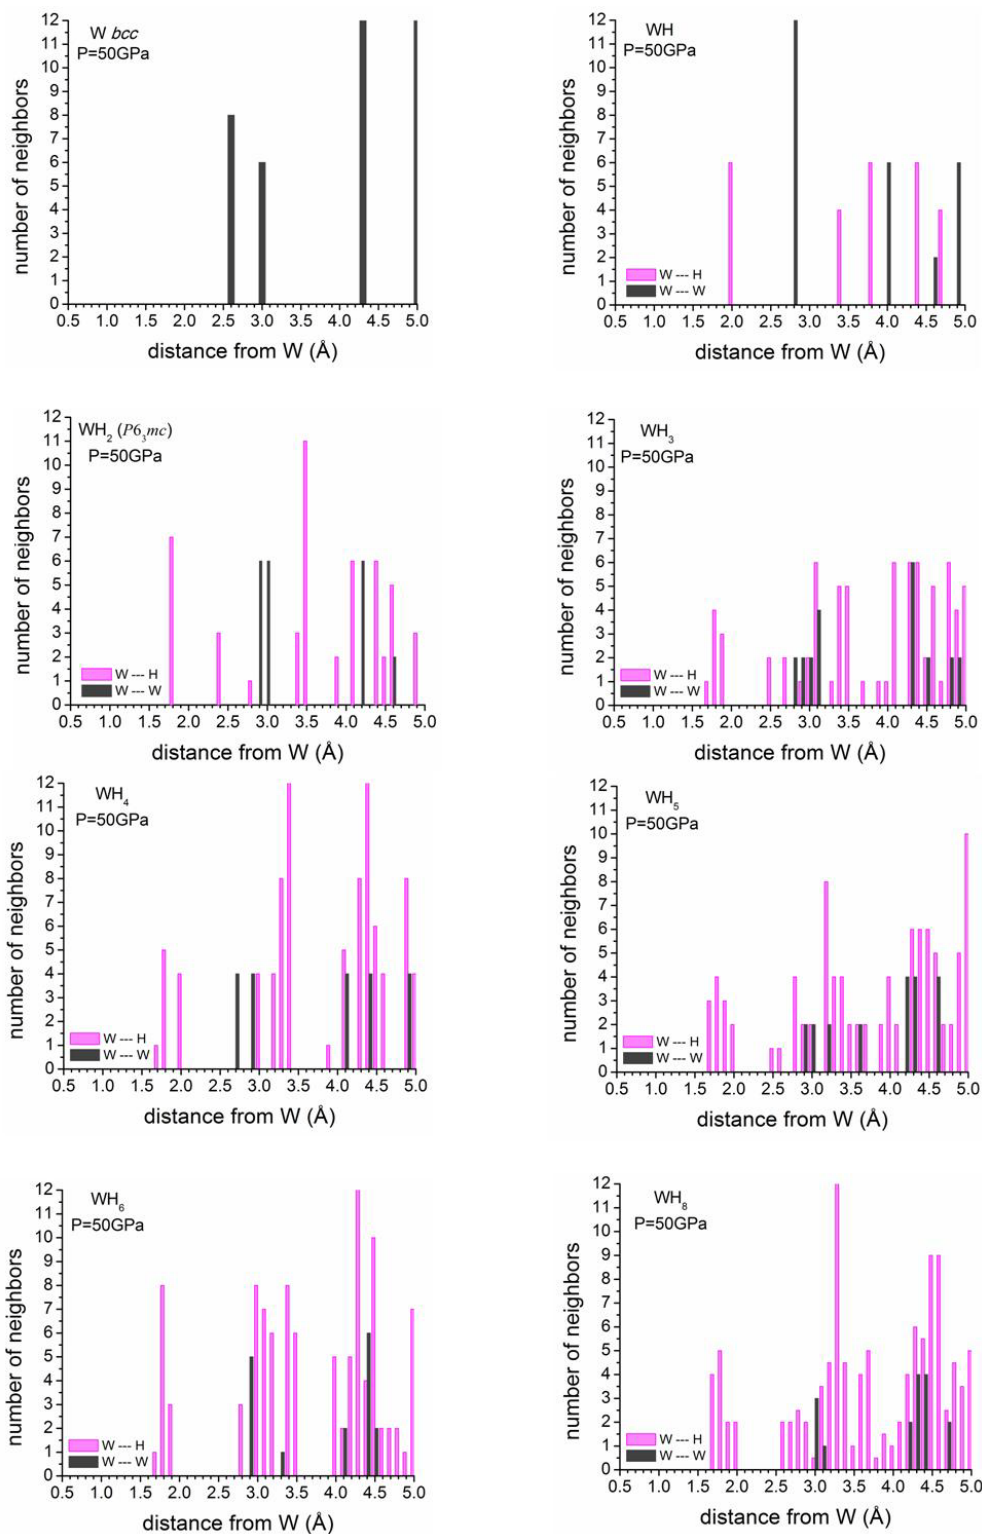

**Figure S1.** Histograms of W-H (pink) and W-W (grey) distances in  $WH_n$   $n=1-6,8$  at  $P=50$  GPa.

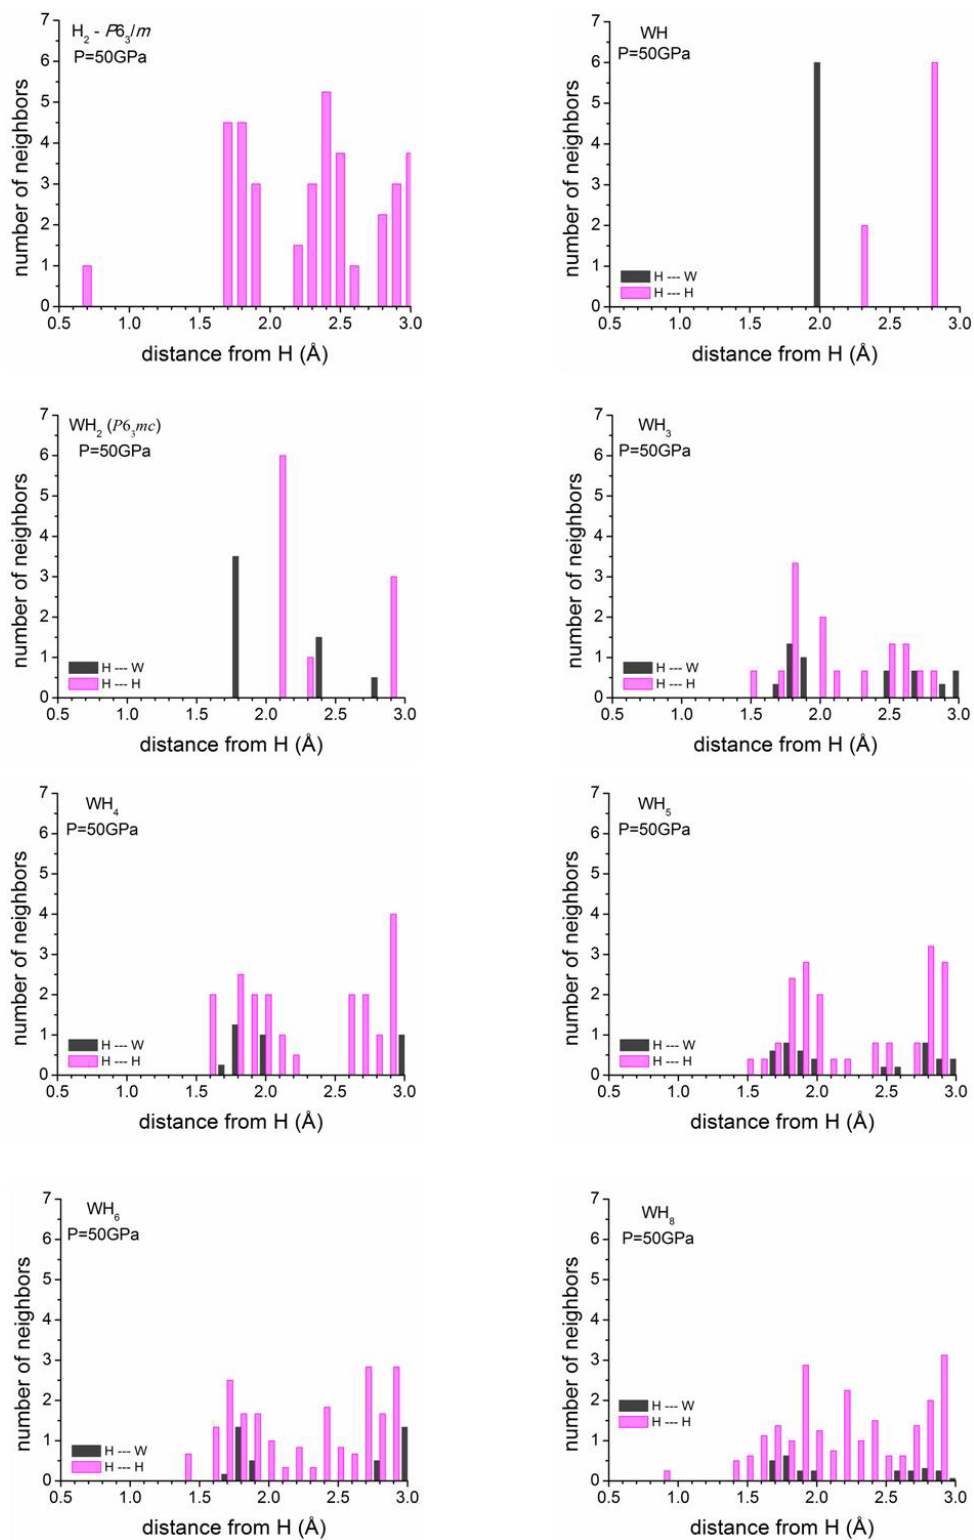

**Figure S2.** Histograms of H-H (pink) and H-W (grey) distances in  $WH_n$   $n=1-6,8$  at  $P=50$  GPa.

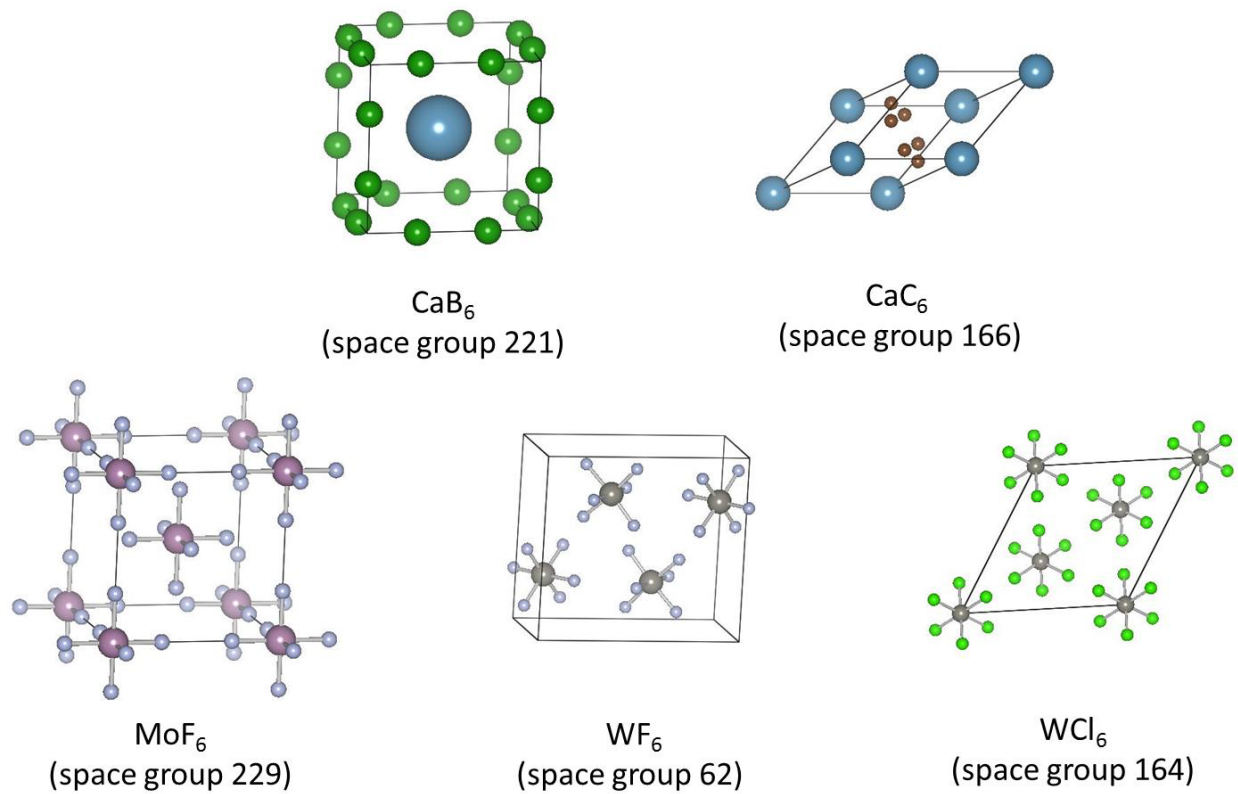

**Figure S3.** Experimental structures of  $\text{CaB}_6$ ,  $\text{CaC}_6$ ,  $\text{MoF}_6$ ,  $\text{WF}_6$  and  $\text{WCl}_6$ .
